# Supplementary material for: Perception of facial expressions reveals selective affect-biased attention in humans and orangutans
Source: PubMed Central journal article supplement (PMC5552869; doi:10.1038/s41598-017-07563-4), 2017-08-10
Supplement: 41598_2017_7563_MOESM1_ESM.pdf [file 41598_2017_7563_MOESM1_ESM.pdf]

# **Title: Perception of facial expressions reveals selective affect-biased attention in humans and orangutans**

Authors: Carla Pritsch<sup>1\*</sup>, Silke Telkemeyer<sup>2</sup>, Cordelia Mühlenbeck<sup>3</sup>, Katja Liebal<sup>4</sup>

Affiliations:

<sup>1</sup> Graduate School “Languages of Emotion”, Department of Education and Psychology, Freie Universität Berlin, Berlin, Germany

<sup>2</sup> Research Group Diversity & Inclusion, Cognitive Sciences, Universität Potsdam, Germany

<sup>3</sup> Department of Psychology, Psychological methodology, Medical University Brandenburg Theodor Fontane, Neuruppin, Germany

<sup>4</sup> Department of Education and Psychology, Comparative Developmental Psychology, Freie Universität Berlin, Berlin, Germany

Correspondence to: [carla.pritsch@fu-berlin.de](mailto:carla.pritsch@fu-berlin.de)

## **Supplementary Materials**

### **Stimuli**

Example orangutan silent-bared teeth vs. human fear expression: While the fearful expression in humans consists of raised brows, widely open eyes exposing a large amount of white sclera, a slight mouth opening showing no or only bottom teeth tips, in great apes, this facial expression is also referred to as the bared-teeth display characterized by retracted lip corners and a raised upper (and lower) lip exposing the teeth (43). To ensure that we included the correct pictures for each type of facial expression, Manuela Lembeck, a certified FACS coder for human facial expressions as well as for orangutans, chimpanzees and gibbons checked the structural features of each picture.

### **Data extraction**

We exported the raw data using the software Matlab (R2014b). All participants were included into the analyses, but 9.0 % of all trials of orangutans and 3.6 % of all trials of humans had to be excluded since they did either not look at one of the predefined AoIs or did not attend to the stimulus for at least 500 ms (of the 3000 ms). In case of multiple measurements of the same stimulus due to replicated sessions in orangutans, we averaged the individual's performance for the replicated trials of the respective session.

## Data Analysis with R

To test our hypothesis that gazing patterns differ as a function of valence of the emotions, we treated observations as repeated measures nested in subjects. Since our predictors (target emotion vs. distractor emotion) were categorical, we had to dummy code the respective combination of emotional facial expressions (*emotion combination*), with each combination representing one factor level and no reference category being implemented. We fitted a linear mixed model in R using the function `lmer` of the R-package `lme4` (48).

## Figures & Tables

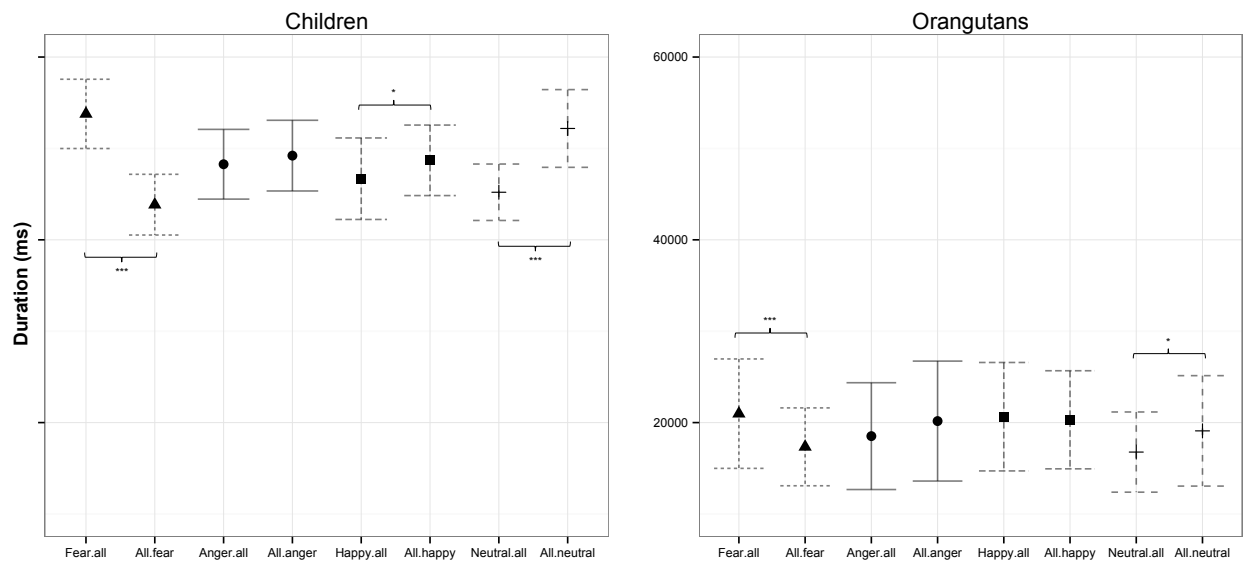

**Fig. S1: Fixation duration at human facial expressions:** Mean estimates of the fixation duration at the target emotion (either Fear, Anger, Happy or Neutral) compared to all corresponding distractors (e.g. "Fear.all" = fear compared to happy, anger, neutral) for human children and orangutans. The corresponding combinations (e.g., Fear.all and All.fear) are depicted by the same symbols and lines. The scales (in ms) are the same for both plots.

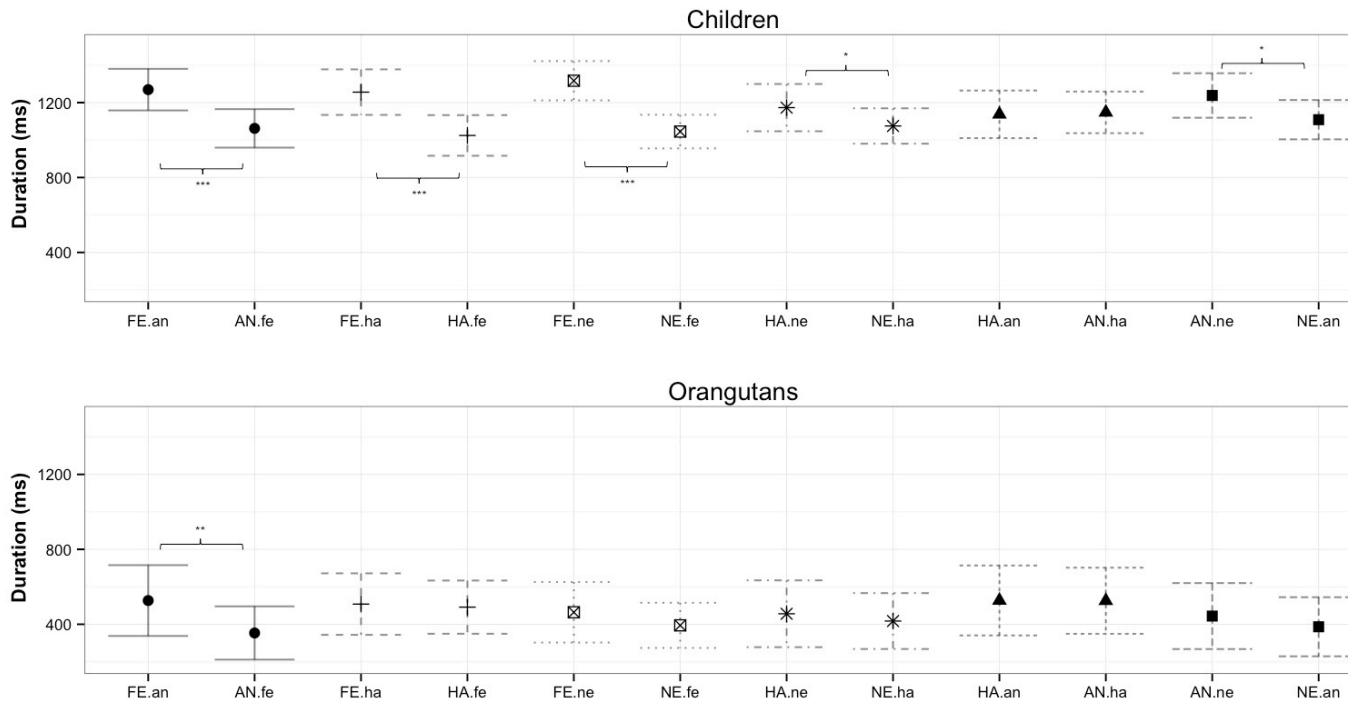

**Fig. S2: Fixation duration (ms) at specific pairs of human facial expressions.** Mean estimates for the fixation duration for each target emotion (in capital letters, e.g. “FE”) compared to a specific distractor emotion (lower case letters, e.g., “an”) for human children and orangutans. The corresponding combined pairs (e.g., FE.an and AN.fe) are depicted by the same symbols and lines. Fe:fear, an=anger, ha=happy, ne=neutral.

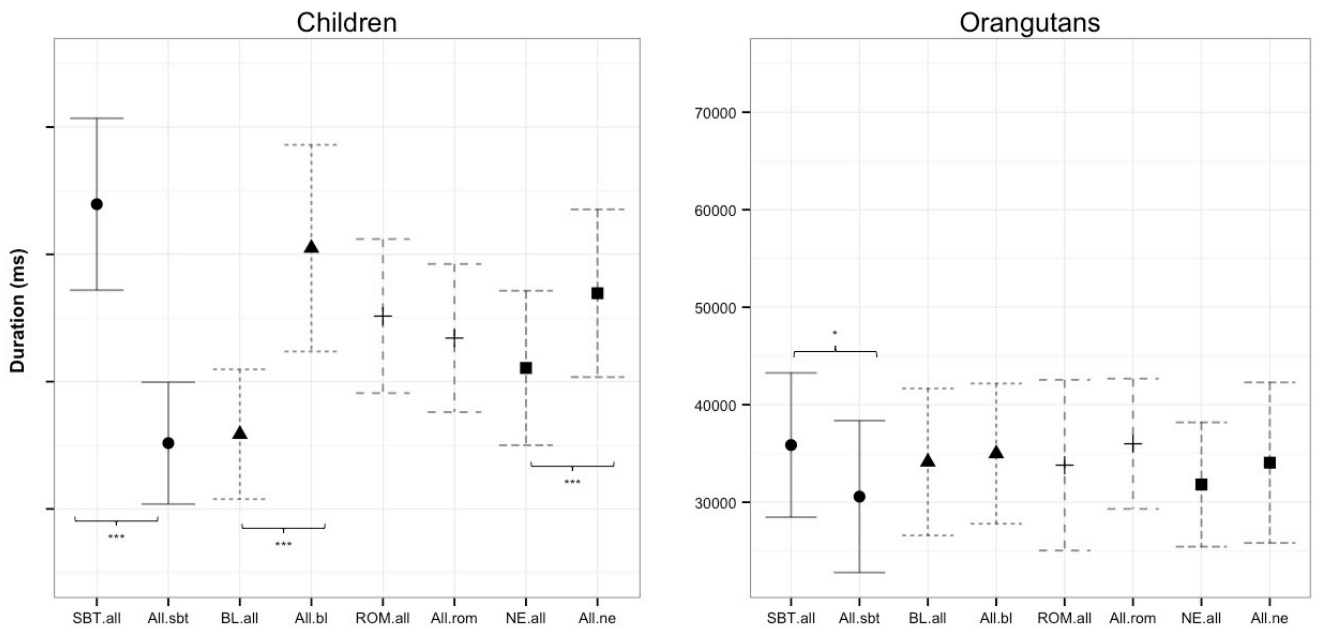

**Fig. S3: Fixation duration (ms) at orangutan facial expressions:** Mean estimates of the fixation duration at the target emotion (either SBT (silent bared-teeth display), ROM (relaxed open mouth display), BL (bulging-lip display) and Neutral) compared to all corresponding distractors (e.g. “SBT.all” = SBT compared to ROM, BL and neutral) for human children and orangutans. The corresponding combined pairs (e.g., SBT. all and All.SBT) are depicted by the same symbols and lines. The scales are the same for both plots. SBT: silent bared-teeth display; BL: bulging-lip display; ROM: relaxed open mouth display; NE: neutral.

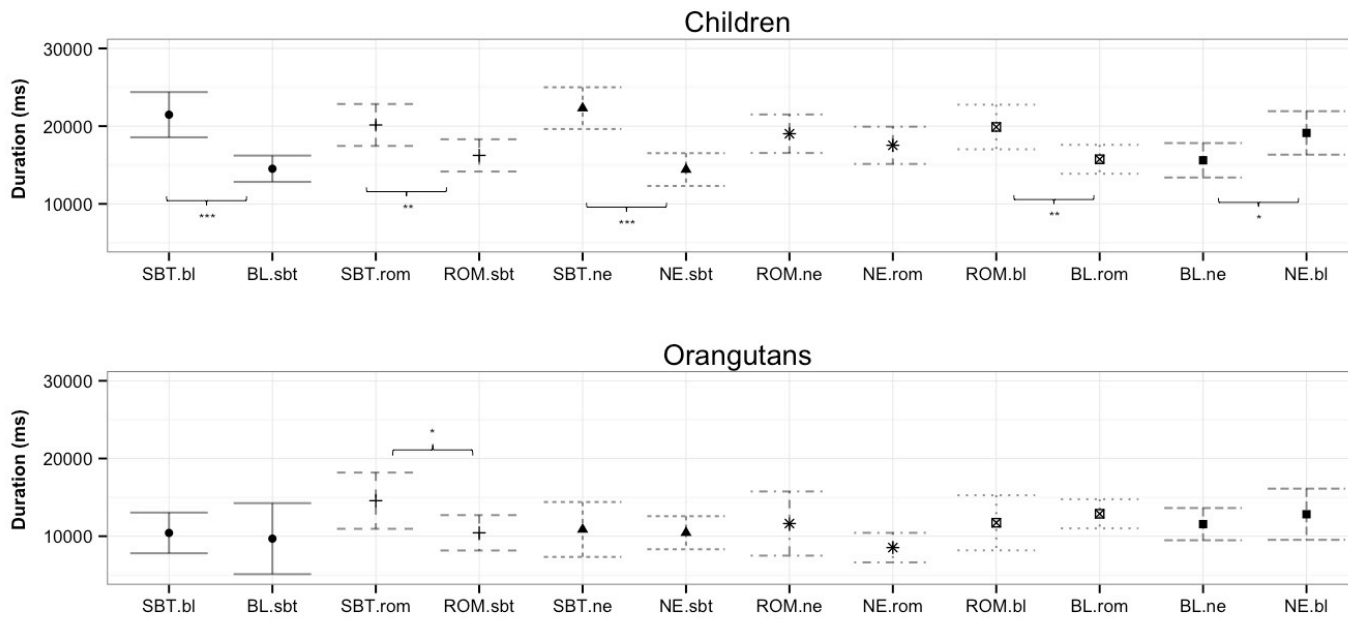

**Fig. S4: Fixation duration (ms) at specific pairs of orangutan facial expressions.** Mean estimates for the fixation duration for each target emotion (in capital letters, e.g. “SBT”) compared to a specific distractor emotion (lower case letters, e.g., “ne”) for human children and orangutans. The corresponding compared pairs (e.g., SBT.ne and NE.sbt) are depicted by the same symbols and lines. SBT: silent bared-teeth display; ROM: relaxed open mouth display; BL: bulging-lip display, NE: neutral.

## Tables S1-S8

**Table S1: Fixation rate estimates at the target emotion compared to all corresponding distractor emotions for human children (Hum) and orangutans (Ape) looking at human facial expressions.** Values are derived from general mixed linear model (GLMM) using the function ‘summary’, predicting estimates, standard errors (Std. Error), upper and lower confidence intervals (upper CI, lower CI), and t-values for the mean fixation rate of Children (Hum) and orangutans (Ape) on a particular target emotion (fear, anger, happy, neutral) compared to the corresponding all other distractor emotions (All.fear=neutral, happy, anger; All.anger=neutral, happy, fear; All.happy=neutral, fear, anger; All.neutral=fear, anger, happy).

| Emotion combination | Estimate |      | Std. Error |      | Upper CI |       | Lower CI |       | t-value |       |
|---------------------|----------|------|------------|------|----------|-------|----------|-------|---------|-------|
|                     | Hum      | Ape  | Hum        | Ape  | Hum      | Ape   | Hum      | Ape   | Hum     | Ape   |
| <b>Fear</b>         | 150.7    | 63.8 | 6.24       | 6.68 | 162.89   | 76.92 | 138.45   | 50.75 | 24.17   | 9.56  |
| <b>Anger</b>        | 136.1    | 57.7 | 5.78       | 6.92 | 147.39   | 71.30 | 124.73   | 44.18 | 23.53   | 8.35  |
| <b>Happy</b>        | 129.8    | 59.4 | 6.54       | 5.69 | 142.63   | 70.59 | 117.00   | 48.29 | 19.85   | 10.45 |
| <b>Neutral</b>      | 126.6    | 50.3 | 5.52       | 6.49 | 137.41   | 62.99 | 115.76   | 37.57 | 22.92   | 7.76  |
| <b>All.fear</b>     | 125.1    | 52.8 | 5.33       | 5.40 | 135.54   | 63.37 | 114.63   | 42.19 | 23.46   | 9.77  |
| <b>All.anger</b>    | 136.0    | 58.7 | 5.89       | 8.52 | 147.50   | 75.39 | 124.41   | 41.98 | 23.08   | 6.89  |
| <b>All.happy</b>    | 136.3    | 60.1 | 6.17       | 6.29 | 148.36   | 72.39 | 124.18   | 47.74 | 22.09   | 9.55  |
| <b>All.neutral</b>  | 145.8    | 59.8 | 6.36       | 6.32 | 158.28   | 72.14 | 133.35   | 47.30 | 22.93   | 9.46  |

**Table S2: Fixation duration estimates at the target emotion compared to all corresponding distractors for human children (Hum) and orangutans (Ape) looking at human facial expressions.** Values are derived from general mixed linear model (GLMM) using the function ‘summary’, predicting estimates, standard errors (Std. Error), upper and lower confidence intervals (upper CI, lower CI), and t-values for the mean fixation duration (in ms) of children (Hum) and orangutans (Ape) on a particular target emotion (fear, anger, happy, neutral) compared to the corresponding all other distractor emotions (All.fear=neutral, happy, anger; All.anger=neutral, happy, fear; All.happy=neutral, fear, anger; All.neutral=fear, anger, happy).

| Emotion combination | Estimate |       | Std. Error |      | Upper CI |         | Lower CI |         | t-value |     |
|---------------------|----------|-------|------------|------|----------|---------|----------|---------|---------|-----|
|                     | Hum      | Ape   | Hum        | Ape  | Hum      | Ape     | Hum      | Ape     | Hum     | Ape |
| <b>Fear</b>         | 53780    | 20977 | 1934       | 3054 | 57569.5  | 26964.0 | 49990.2  | 14990.5 | 27.8    | 6.9 |
| <b>Anger</b>        | 48269    | 18519 | 1947       | 2982 | 52984.2  | 24363.1 | 44453.7  | 12675.3 | 24.8    | 6.2 |
| <b>Happy</b>        | 46687    | 20645 | 2275       | 3027 | 51146.1  | 26577.4 | 42227.8  | 14711.8 | 20.5    | 6.8 |
| <b>Neutral</b>      | 45205    | 16774 | 1575       | 2238 | 48292.1  | 21161.5 | 42117.0  | 12386.6 | 28.7    | 7.5 |
| <b>All.fear</b>     | 43846    | 17348 | 1695       | 2174 | 47168.4  | 21608.8 | 40524.0  | 13087.4 | 25.9    | 8.0 |
| <b>All.anger</b>    | 49212    | 20166 | 1974       | 3348 | 53079.8  | 26727.9 | 45343.8  | 13603.5 | 24.9    | 6.0 |
| <b>All.happy</b>    | 48698    | 20307 | 1968       | 2738 | 52555.1  | 25673.4 | 44840.8  | 14940.7 | 24.8    | 7.4 |
| <b>All.neutral</b>  | 52184    | 19094 | 2170       | 3083 | 56436.9  | 25136.5 | 47931.8  | 13052.1 | 24.1    | 6.2 |

**Table S3: Fixation rate estimates at the target emotion compared to a specific distractor emotion for human children (Hum) and orangutans (Ape) looking at human facial expressions.** Values are derived from general mixed linear model (GLMM) using the function ‘summary’, predicting estimates, standard errors (Std. Error), upper and lower confidence intervals (upper CI, lower CI), and t-values of the mean fixation rate of children (Hum) and orangutans (Ape) on a particular target emotion (Fear, Anger, Happy, Neutral) compared to another specific distractor emotion (-.fe, -.an, -.ha, -.ne). fe=fear, an=anger, ha=happy, ne=neutral.

| Emotion combination | Estimate |      | Std. Error |      | Upper CI |      | Lower CI |      | t-value |     |
|---------------------|----------|------|------------|------|----------|------|----------|------|---------|-----|
|                     | Hum      | Ape  | Hum        | Ape  | Hum      | Ape  | Hum      | Ape  | Hum     | Ape |
| <b>Anger.fe</b>     | 3.04     | 1.18 | 0.15       | 0.21 | 3.34     | 1.58 | 2.74     | 0.78 | 19.7    | 5.7 |
| <b>Fear.an</b>      | 3.56     | 1.53 | 0.16       | 0.27 | 3.87     | 2.06 | 3.25     | 1.01 | 22.6    | 5.7 |
| <b>Anger.ne</b>     | 3.40     | 1.40 | 0.17       | 0.25 | 3.74     | 1.88 | 3.07     | 0.92 | 20.2    | 5.7 |
| <b>Neutral.an</b>   | 3.11     | 1.14 | 0.18       | 0.23 | 3.46     | 1.58 | 2.76     | 0.70 | 17.4    | 5.1 |
| <b>Fear.ha</b>      | 3.50     | 1.49 | 0.19       | 0.20 | 3.88     | 1.89 | 3.12     | 1.09 | 18.2    | 7.4 |
| <b>Happy.fe</b>     | 2.92     | 1.39 | 0.18       | 0.17 | 3.27     | 1.73 | 2.56     | 1.06 | 16.0    | 8.1 |
| <b>Neutral.ha</b>   | 2.96     | 1.26 | 0.16       | 0.22 | 3.27     | 1.69 | 2.64     | 0.83 | 18.3    | 5.7 |
| <b>Happy.ne</b>     | 3.31     | 1.33 | 0.18       | 0.20 | 3.66     | 1.72 | 2.96     | 0.94 | 18.4    | 6.7 |
| <b>Anger.ha</b>     | 3.27     | 1.54 | 0.16       | 0.20 | 3.59     | 1.94 | 2.96     | 1.15 | 20.4    | 7.7 |
| <b>Happy.an</b>     | 3.05     | 1.52 | 0.16       | 0.22 | 3.37     | 1.96 | 2.73     | 1.08 | 18.5    | 6.8 |
| <b>Fear.ne</b>      | 3.70     | 1.54 | 0.17       | 0.17 | 4.03     | 1.86 | 3.38     | 1.21 | 22.2    | 9.3 |
| <b>Neutral.fe</b>   | 2.98     | 1.20 | 0.13       | 0.19 | 3.22     | 1.57 | 2.73     | 0.83 | 23.7    | 6.4 |

**Table S4: Fixation duration estimates at the target emotion compared to a specific distractor emotion for human children (Hum) and orangutans (Ape) looking at human facial expressions.** Values are derived from general mixed linear model (GLMM) using the function ‘summary’, predicting estimates, standard errors (Std. Error), upper and lower confidence intervals (upper CI, lower CI), and t-values of the mean fixation duration (in ms) of children (Hum) and orangutans (Ape) on a particular target emotion (Fear, Anger, Happy, Neutral) compared to another specific distractor emotion (-.fe, -.an, -.ha, -.ne). fe=fear, an=anger, ha=happy, ne=neutral.

| Emotion combination | Estimate |       | Std. Error |      | Upper CI |       | Lower CI |       | t-value |     |
|---------------------|----------|-------|------------|------|----------|-------|----------|-------|---------|-----|
|                     | Hum      | Ape   | Hum        | Ape  | Hum      | Ape   | Hum      | Ape   | Hum     | Ape |
| <b>Anger.fe</b>     | 1062.2   | 353.5 | 52.5       | 72.5 | 1165.0   | 495.6 | 959.4    | 211.3 | 20.3    | 4.9 |
| <b>Fear.an</b>      | 1269.1   | 526.6 | 56.6       | 96.4 | 1380.1   | 715.6 | 1158.2   | 337.6 | 22.4    | 5.5 |
| <b>Anger.ne</b>     | 1237.8   | 443.8 | 60.6       | 89.9 | 1356.6   | 619.9 | 1119.1   | 267.6 | 20.4    | 4.9 |
| <b>Neutral.an</b>   | 1108.7   | 386.7 | 53.5       | 80.5 | 1213.6   | 544.4 | 1003.9   | 229.0 | 20.7    | 4.8 |
| <b>Fear.ha</b>      | 1255.7   | 507.8 | 62.0       | 83.8 | 1377.3   | 671.9 | 1134.1   | 343.6 | 20.2    | 6.1 |
| <b>Happy.fe</b>     | 1024.5   | 491.4 | 55.3       | 72.5 | 1132.9   | 633.4 | 916.0    | 349.4 | 18.5    | 6.8 |
| <b>Neutral.ha</b>   | 1075.0   | 417.2 | 48.2       | 76.1 | 1169.5   | 566.4 | 980.5    | 268.0 | 22.3    | 5.5 |
| <b>Happy.ne</b>     | 1173.0   | 456.1 | 64.4       | 91.0 | 1299.2   | 634.5 | 1046.8   | 277.7 | 18.2    | 5.0 |
| <b>Anger.ha</b>     | 1147.7   | 525.5 | 56.7       | 90.1 | 1258.8   | 702.1 | 1036.6   | 349.0 | 20.3    | 5.8 |
| <b>Happy.an</b>     | 1137.3   | 527.1 | 64.8       | 95.3 | 1264.3   | 713.8 | 1010.3   | 340.4 | 17.6    | 5.5 |
| <b>Fear.ne</b>      | 1316.6   | 464.0 | 53.5       | 82.4 | 1421.4   | 625.5 | 1211.8   | 302.5 | 24.6    | 5.6 |
| <b>Neutral.fe</b>   | 1045.2   | 394.3 | 45.8       | 61.5 | 1134.9   | 514.8 | 955.4    | 273.7 | 22.8    | 6.4 |



**Table S5: Fixation rate estimates at the target emotion compared to all distractor emotions for human children (Hum) and orangutans (Ape) looking at orangutan facial expressions.** Values are derived from general mixed linear model (GLMM), predicting estimates, standard errors (Std. Error), upper and lower confidence intervals (upper CI, lower CI), and t-values of the mean fixation rate on a particular target. The target reflects one of the emotions SBT (silent bared-teeth display), ROM (relaxed open mouth display), BL (bulging-lip display), and Neutral compared to the corresponding all other distractor expressions (All.sbt=neutral, rom, bl; All.rom=neutral, sbt, bl; All.bl=neutral, sbt, rom; All.neutral=sbt, rom, bl).

| Emotion combination | Estimate |       | Std. Error |       | Upper CI |        | Lower CI |       | t-value |       |
|---------------------|----------|-------|------------|-------|----------|--------|----------|-------|---------|-------|
|                     | Hum      | Ape   | Hum        | Ape   | Hum      | Ape    | Hum      | Ape   | Hum     | Ape   |
| <b>SBT</b>          | 179.3    | 118.2 | 9.57       | 12.65 | 198.04   | 142.98 | 160.51   | 93.39 | 18.73   | 9.34  |
| <b>ROM</b>          | 163.0    | 108.6 | 9.01       | 11.74 | 180.64   | 131.56 | 145.31   | 85.56 | 18.08   | 9.25  |
| <b>BL</b>           | 137.0    | 113.2 | 6.68       | 10.29 | 150.12   | 133.32 | 123.93   | 93.00 | 20.51   | 11.00 |
| <b>Neutral</b>      | 151.9    | 104.4 | 8.63       | 10.94 | 168.81   | 125.85 | 134.99   | 82.96 | 17.61   | 9.54  |
| <b>All.sbt</b>      | 138.4    | 101.2 | 6.83       | 9.77  | 151.74   | 120.30 | 124.96   | 82.01 | 20.25   | 10.36 |
| <b>All.rom</b>      | 157.3    | 119.0 | 8.36       | 11.95 | 173.64   | 142.42 | 140.86   | 95.58 | 18.80   | 9.96  |
| <b>All.bl</b>       | 173.1    | 111.5 | 11.22      | 10.26 | 195.07   | 131.64 | 151.08   | 91.42 | 15.42   | 10.87 |
| <b>All.neutral</b>  | 162.5    | 112.6 | 9.57       | 12.81 | 181.25   | 137.73 | 143.75   | 87.52 | 16.98   | 8.79  |

**Table S6: Fixation duration estimates at the target emotion compared to all corresponding distractor emotions for human children (Hum) and orangutans (Ape) looking at orangutan facial expressions.** Values are derived from general mixed linear model (GLMM), predicting estimates, standard errors (Std. Error), upper and lower confidence intervals (upper CI, lower CI), and t-values of the mean fixation duration (in ms) on a particular target. The target reflects one of the emotions SBT (silent bared-teeth display), ROM (relaxed open mouth display), BL (bulging-lip display), and Neutral compared to the corresponding all other distractor expressions (All.Sbt=neutral, rom, bl; All.Rom=neutral, sbt, bl; All.Bl=neutral, sbt, rom; All.neutral=sbt, rom, bl).

| Emotion combination | Estimate |       | Std. Error |      | Upper CI |         | Lower CI |         | t-value |      |
|---------------------|----------|-------|------------|------|----------|---------|----------|---------|---------|------|
|                     | Hum      | Ape   | Hum        | Ape  | Hum      | Ape     | Hum      | Ape     | Hum     | Ape  |
| <b>SBT</b>          | 63939    | 35863 | 3444       | 3775 | 70689.9  | 43261.8 | 57188.2  | 28464.9 | 18.6    | 9.5  |
| <b>ROM</b>          | 55148    | 33799 | 3089       | 4466 | 61203.6  | 42553.5 | 49093.3  | 25045.2 | 17.9    | 7.6  |
| <b>BL</b>           | 45864    | 34128 | 2600       | 3843 | 50960.3  | 41659.9 | 40768.0  | 26595.1 | 17.6    | 8.9  |
| <b>Neutral</b>      | 51073    | 31812 | 3097       | 3251 | 57142.8  | 38184.0 | 45003.8  | 25440.5 | 16.5    | 9.8  |
| <b>All.sbt</b>      | 45169    | 30576 | 2443       | 3975 | 49957.0  | 38366.0 | 40381.7  | 22785.2 | 18.5    | 7.7  |
| <b>All.rom</b>      | 53423    | 35992 | 2970       | 3408 | 59243.7  | 42671.8 | 47602.1  | 29311.7 | 18.0    | 10.6 |
| <b>All.bl</b>       | 60488    | 34982 | 4143       | 3669 | 68608.2  | 42173.4 | 52368.2  | 27789.6 | 14.6    | 9.5  |
| <b>All.neutral</b>  | 56944    | 34054 | 3362       | 4201 | 63533.0  | 42287.9 | 50356.0  | 25819.5 | 16.9    | 8.1  |

**Table S7: Fixation rate estimates at the target emotion compared to a specific distractor emotion for human children (Hum) and orangutans (Ape) looking at orangutan expressions.** Values are derived from general mixed linear model (GLMM), predicting estimates, standard errors (Std. Error), upper and lower confidence intervals (upper CI, lower CI), and t-values of the mean fixation rate on a particular target emotion (SBT, ROM, BL, NE) compared to another specific distractor emotion (sbt, rom, bl, ne). Note that SBT/sbt = silent bared-teeth, ROM/rom = relaxed open mouth display, BL/bl = bulging-lip display, NE/ne = neutral. Targets are indicated by capital letters, followed by the respective specific distractor abbreviated in lower case letters.

| Emotion combination | Estimate |       | Std. Error |      | Upper CI |       | Lower CI |       | t-value |      |
|---------------------|----------|-------|------------|------|----------|-------|----------|-------|---------|------|
|                     | Hum      | Ape   | Hum        | Ape  | Hum      | Ape   | Hum      | Ape   | Hum     | Ape  |
| <b>SBT.ne</b>       | 61.40    | 37.19 | 4.09       | 5.95 | 69.41    | 48.85 | 53.39    | 25.52 | 15.0    | 6.2  |
| <b>NE.sbt</b>       | 44.35    | 35.41 | 2.93       | 3.07 | 50.09    | 41.43 | 38.61    | 29.39 | 15.2    | 11.5 |
| <b>SBT.bl</b>       | 59.58    | 34.13 | 3.72       | 3.93 | 66.86    | 41.82 | 52.29    | 26.43 | 16.0    | 8.7  |
| <b>BL.sbt</b>       | 45.35    | 31.47 | 2.50       | 5.96 | 50.24    | 43.15 | 40.46    | 19.79 | 18.2    | 5.3  |
| <b>SBT.rom</b>      | 58.30    | 46.88 | 3.93       | 5.93 | 66.01    | 58.49 | 50.59    | 35.26 | 14.8    | 7.9  |
| <b>ROM.sbt</b>      | 48.65    | 34.28 | 3.17       | 3.40 | 54.86    | 40.94 | 42.44    | 27.62 | 15.4    | 10.1 |
| <b>ROM.ne</b>       | 56.05    | 36.44 | 3.57       | 5.95 | 63.04    | 48.09 | 49.06    | 24.78 | 15.7    | 6.1  |
| <b>NE.rom</b>       | 52.33    | 29.44 | 3.19       | 4.06 | 46.07    | 37.39 | 58.58    | 21.48 | 16.4    | 7.3  |
| <b>BL.ne</b>        | 45.05    | 39.00 | 2.86       | 3.56 | 50.65    | 45.97 | 39.45    | 32.03 | 15.8    | 11.0 |
| <b>NE.bl</b>        | 55.23    | 39.56 | 4.16       | 4.93 | 63.38    | 49.23 | 47.07    | 29.89 | 13.3    | 8.0  |
| <b>ROM.bl</b>       | 58.28    | 37.84 | 4.08       | 4.61 | 66.27    | 46.88 | 50.28    | 28.81 | 14.3    | 8.2  |
| <b>BL.rom</b>       | 46.63    | 42.69 | 2.53       | 3.14 | 51.57    | 48.85 | 41.68    | 36.53 | 18.5    | 13.6 |

**Table S8: Fixation duration estimates at the target emotion compared to specific distractor emotions for human children (Hum) and orangutans (Ape) looking at orangutan facial expressions.** Values are derived from general mixed linear model (GLMM), predicting estimates, standard errors (Std. Error), upper and lower confidence intervals (upper CI, lower CI), and t-values of the mean fixation duration (in ms) on a particular target emotion (SBT, ROM, BL, NE) compared to another specific distractor emotion (sbt, rom, bl, ne). SBT/sbt = silent bared-teeth, ROM/rom = relaxed open mouth display, BL/bl = bulging-lip display, NE/ne = neutral. Targets are indicated by capital letters, followed by the respective specific distractor abbreviated in lower case letters.

| Emotion combination | Estimate |         | Std. Error |        | Upper CI |         | Lower CI |         | t-value |      |
|---------------------|----------|---------|------------|--------|----------|---------|----------|---------|---------|------|
|                     | Hum      | Ape     | Hum        | Ape    | Hum      | Ape     | Hum      | Ape     | Hum     | Ape  |
| <b>SBT.ne</b>       | 22316.3  | 10867.6 | 1370.8     | 1802.2 | 25003.0  | 14399.9 | 19629.6  | 7335.3  | 16.3    | 6.0  |
| <b>NE.sbt</b>       | 14414.5  | 10449.0 | 1077.0     | 1086.3 | 16525.4  | 12578.1 | 12303.7  | 8319.9  | 13.4    | 9.6  |
| <b>SBT.bl</b>       | 21471.3  | 10423.9 | 1485.7     | 1334.8 | 24383.3  | 13040.2 | 18559.4  | 7807.7  | 14.5    | 7.8  |
| <b>BL.sbt</b>       | 14520.5  | 9687.3  | 862.5      | 2330.3 | 16211.1  | 14254.7 | 12830.0  | 5120.0  | 16.8    | 4.2  |
| <b>SBT.rom</b>      | 20151.4  | 14571.8 | 1375.4     | 1846.7 | 22847.1  | 18191.3 | 17455.7  | 10952.3 | 14.7    | 7.9  |
| <b>ROM.sbt</b>      | 16234.3  | 10439.3 | 1058.1     | 1160.7 | 18308.2  | 12714.3 | 14160.4  | 8164.3  | 15.3    | 9.0  |
| <b>ROM.ne</b>       | 19022.5  | 11631.3 | 1262.9     | 2106.9 | 21497.8  | 15760.9 | 16547.2  | 7501.8  | 15.1    | 5.5  |
| <b>NE.rom</b>       | 17533.5  | 8534.4  | 1222.3     | 970.5  | 19929.2  | 10436.6 | 15137.9  | 6632.3  | 14.4    | 8.8  |
| <b>BL.ne</b>        | 15605.7  | 11554.7 | 1130.7     | 1058.1 | 17821.8  | 13628.4 | 13389.6  | 9480.9  | 13.8    | 10.9 |
| <b>NE.bl</b>        | 19125.2  | 12828.8 | 1427.8     | 1680.4 | 21923.6  | 16122.4 | 16326.8  | 9535.3  | 13.4    | 7.6  |
| <b>ROM.bl</b>       | 19891.7  | 11728.7 | 1464.2     | 1809.1 | 22761.4  | 15274.4 | 17021.9  | 8183.0  | 13.6    | 6.5  |
| <b>BL.rom</b>       | 15738.0  | 12885.5 | 949.2      | 956.2  | 17598.4  | 14759.7 | 13877.5  | 11011.3 | 16.6    | 13.5 |

**Table S9: Fixation duration and fixation rate comparisons on same vs. other species stimuli.** Values are derived from a paired t-test, comparing children's fixation duration and fixation rate on orangutan stimuli (CsA) and human stimuli (CsH) as well as orangutans' fixations on orangutan stimuli (AsA) and human stimuli (AsH).

| <b>Paired t-test</b> |             |          |           |                       |                 |                 |          |           |          |
|----------------------|-------------|----------|-----------|-----------------------|-----------------|-----------------|----------|-----------|----------|
|                      |             | <b>M</b> | <b>SD</b> | <b>Standard error</b> | <b>Lower CI</b> | <b>Upper CI</b> | <b>T</b> | <b>df</b> | <b>p</b> |
| Fixation rate        | CsA vs. CsH | 0,003    | 0,039     | 0,011                 | -0,022          | 0,028           | 0,293    | 11        | 0,775    |
|                      | AsA vs. AsH | 0,077    | 0,026     | 0,008                 | 0,060           | 0,093           | 10,06    | 11        | 0        |
| Fixation duration    | CsA vs. CsH | -2,435   | 16,855    | 4,866                 | -13,144         | 8,274           | -0,5     | 11        | 0,627    |
|                      | AsA vs. AsH | 20,703   | 9,242     | 2,668                 | 14,831          | 26,574          | 7,76     | 11        | 0        |
